# Supplementary material for: Microwave-assisted synthesis of monoclinic–tetragonal BiVO4 heterojunctions with enhanced visible-light-driven photocatalytic degradation of tetracycline
Source: Royal Society of Chemistry journal article supplement (doi:10.1039/c5ra13684a), 2015-01-01
Supplement: c5ra13684a1.pdf [file c5ra13684a1.pdf]

## Supporting information

### **Microwave-assisted synthesis of monoclinic-tetragonal BiVO<sub>4</sub> heterojunctions with enhanced visible-light-driven photocatalytic degradation of tetracycline**

*Ming Yan<sup>a</sup>, Yan Yan<sup>b</sup>, Yilin Wu<sup>b</sup>, Yinqun Hua<sup>a</sup>, Weidong Shi<sup>b,\*</sup>*

*<sup>a</sup> School of Material Science and Engineering, Jiangsu University, Zhenjiang 212013, China*

*<sup>b</sup> School of Chemistry and Chemical Engineering, Jiangsu University, Zhenjiang 212013, China*

*Corresponding Author\**

E-mail: [shiweidong321123@163.com](mailto:shiweidong321123@163.com)

Telephone Number: +86-511-88791800; fax: +86 0511-88791800

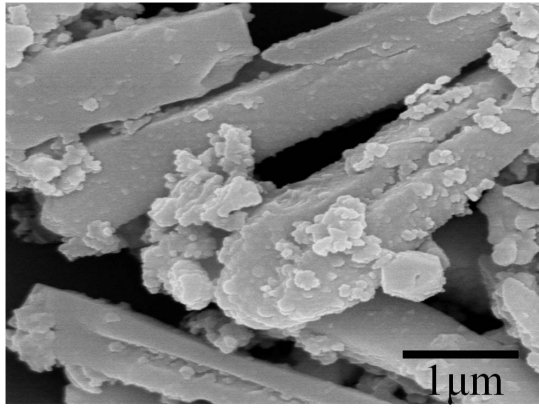

Fig. S1. The SEM image of the M-T sample after four cycle experiments.
